# Supplementary material for: Structural progression of amyloid-β Arctic mutant aggregation in cells revealed by multiparametric imaging
Source: PubMed Central journal article supplement (PMC6364760; doi:10.1074/jbc.ra118.004511), 2018-11-30
Supplement: supp_RA118.004511_138880_2_supp_236368_p99k60.pdf [file supp_RA118.004511_138880_2_supp_236368_p99k60.pdf]

Direct in-cell observation of structural progression of amyloid- $\beta$  Arctic mutant aggregation

**Meng Lu<sup>1,2</sup>, Neil Williamson<sup>2</sup>, Ajay Mishra<sup>1,2</sup>, Claire H. Michel<sup>2</sup>, Clemens F. Kaminski<sup>1,2</sup>, Alan Tunnacliffe<sup>1</sup>, Gabriele S. Kaminski Schierle<sup>1,2</sup>**

<sup>1</sup>Cambridge Infinitus Research Centre, Department of Chemical Engineering and Biotechnology, University of Cambridge, Cambridge CB2 3RA, United Kingdom

<sup>2</sup>Department of Chemical Engineering and Biotechnology, University of Cambridge, West Cambridge Site, Philippa Fawcett Drive, Cambridge, CB3 0AS, United Kingdom

### **Supporting information**

Figure S1

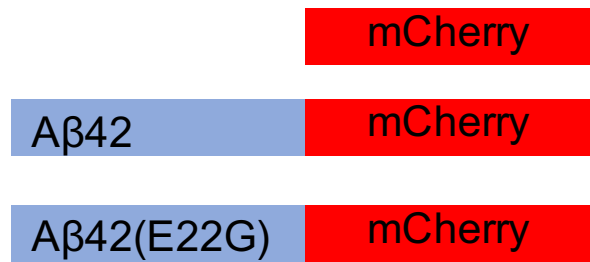

Figure S1. Three single-copy, stable cell lines in Flp-In T-Rex293 cells expressing mCherry, mCherry-A $\beta$ (WT) or mCherry-A $\beta$ (E22G).

**Video 1:** 3D SIM reconstruction of fibril pools in cytosol.

**Video 2:** 3D SIM reconstruction of oligomers, single fibrils and fibril clusters.

**Video 3:** 3D SIM reconstruction of a compacted aggresome.

#### KEY RESOURCES TABLE

| REAGENT or RESOURCE                           | SOURCE       | IDENTIFIER      |
|-----------------------------------------------|--------------|-----------------|
| Chemicals, Peptides, and Recombinant Proteins |              |                 |
| DMEM                                          | Sigma        | Cat#D5546       |
| Hygromycine B                                 | Sigma        | Cat#10843555001 |
| Blasticidine S hydrochloride                  | Sigma        | Cat#15205       |
| FBS                                           | Sigma        | Cat#F2442       |
| Hoechst 33258                                 | Sigma        | Cat#94403       |
| Critical Commercial Assays                    |              |                 |
| QIAprep Spin Miniprep Kit                     | QIAGEN       | Cat#27104       |
| QIAprep Gel Extraction Kit                    | QIAGEN       | Cat#28704       |
| DNeasy Blood&Tissue Kit                       | QIAGEN       | Cat#69504       |
| DreamTaq Hot Start DNA Polymerase             | ThermoFisher | Cat#EP1701      |
| Phusion High-Fidelity PCR Kit                 | NEB          | Cat#E0553S      |
| Experimental Models: Cell Lines               |              |                 |
| mCherry cells                                 | This paper   | N/A             |

|                                        |                   |             |
|----------------------------------------|-------------------|-------------|
| mCherry-A $\beta$ (WT) cells           | This paper        | N/1         |
| mCherry-A $\beta$ (E22G) cells         | This paper        | N/A         |
| Flp-In T-Rex293                        | Thermo SCIENTIFIC | Cat#R78007  |
| HDQ72-EGFP cells                       | Reference 32      | N/A         |
| Recombinant DNA                        |                   |             |
| pcDNA5/FRT/TO-mCherry                  | This paper        | N/A         |
| pcDNA5/FRT/TO-mCherry-A $\beta$ (WT)   | This paper        | N/A         |
| pcDNA5/FRT/TO-mCherry-A $\beta$ (E22G) | This paper        | N/A         |
| pcDNA5/FRT/TO                          | Thermo SCIENTIFIC | Cat#V652020 |

Sequence of plasmids used for stable cell line construction are shown below:

pcDNA5/FRT/TO-mCherry

GACGGATCGGGAGATCTCCCGATCCCCTATGGTGC ACTCTCAGTACAATCTGCTC  
TGATGCCGCATAGTTAAGCCAGTATCTGCTCCCTGCTTGTGTGTTGGAGGTCGCT  
GAGTAGTGCGCGAGCAAATTTAAGCTACAACAAGGCAAGGCTTGACCGACAAT  
TGCATGAAGAATCTGCTTAGGGTTAGGCGTTTTGCGCTGCTTCGCGATGTACGGG  
CCAGATATACGCGTTGACATTGATTATTGACTAGTTATTAATAGTAATCAATTAC  
GGGGTCATTAGTTCATAGCCCATATATGGAGTTCGCGGTTACATAACTTACGGTA  
AATGGCCCGCCTGGCTGACCGCCCAACGACCCCCGCCATTGACGTCAATAATG  
ACGTATGTTCCCATAGTAACGCCAATAGGGACTTTCATTGACGTCAATGGGTGG  
AGTATTTACGGTAAACTGCCACTTGGCAGTACATCAAGTGTATCATATGCCAAG  
TACGCCCCCTATTGACGTCAATGACGGTAAATGGCCCGCCTGGCATTATGCCAG  
TACATGACCTTATGGGACTTTCCTACTTGGCAGTACATCTACGTATTAGTCATCGC  
TATTACCATGGTGTATGCGGTTTTGGCAGTACATCAATGGGCGTGGATAGCGGTTT  
GACTCACGGGGATTTCCAAGTCTCCACCCCAATTGACGTCAATGGGAGTTTGT  
GGCACCAAATCAACGGGACTTTCAAAATGTCGTAACA ACTCCGCCCCATTGA  
CGCAAATGGGCGGTAGGCGGTACGGTGGGAGGTCTATATAAGCAGAGCTCTCC  
CTATCAGTGATAGAGATCTCCCTATCAGTGATAGAGATCGTCGACGAGCTCGTTT  
AGTGAACCGTCAGATCGCCTGGAGACGCCATCCACGCTGTTTTGACCTCCATAGA  
AGACACCGGGACCGATCCAGCCTCCGGACTCTAGCGTTTTAACTTAAGCTTGGTA  
CCGAGCTCGGATCCGCTGGCTCCGCTGCTGGTTCTGGCGAATCCCATATGGTGAG  
CAAGGGCGAGGAGGATAACATGGCCATCATCAAGGAGTTCATGCGCTTCAAGGT  
GCACATGGAGGGCTCCGTGAACGGCCACGAGTTCGAGATCGAGGGCGAGGGCG  
AGGGCCGCCCTACGAGGGCACCCAGACCGCCAAGCTGAAGGTGACCAAGGGTG  
GCCCCCTGCCCTTCGCCTGGGACATCCTGTCCCCTCAGTTCATGTACGGCTCCAA  
GGCCTACGTGAAGCACCCCGCCGACATCCCCGACTACTTGAAGCTGTCCTTCCCC  
GAGGGCTTCAAGTGGGAGCGCGTGATGAACTTCGAGGACGGCGGCGTGGTGACC  
GTGACCCAGGACTCCTCCCTGCAGGACGGCGAGTTCATCTACAAGGTGAAGCTG  
CGCGGCACCAACTTCCCCTCCGACGGCCCCGTAATGCAGAAGAAGACCATGGGC  
TGGGAGGCCTCCTCCGAGCGGATGTACCCCGAGGACGGCGCCCTGAAGGGCGAG  
ATCAAGCAGAGGCTGAAGCTGAAGGACGGCGGCCACTACGACGCTGAGGTCAA  
GACCACCTACAAGGCCAAGAAGCCCGTGCAGCTGCCCGGCGCCTACAACGTCAA  
CATCAAGTTGGACATCACCTCCCACAACGAGGACTACACCATCGTGGAACAGTA

CGAACGCGCCGAGGGCCGCCACTCCACCGGCGGCATGGACGANCTGTACAAGTA  
ACTCGAGTCTAGAGGGGCCGTTTAAACCCGCTGATCAGCCTCGACTGTGCCTTCT  
AGTTGCCAGCCATCTGTTGTTTGGCCCTCCCCCGTGCCTTCCCTTGACCCTGGAAGG  
TGCCACTCCCCTGTCTTTTCTAATAAAAATGAGGAAATTGCATCGCATTGTCTG  
AGTAGGTGTCATTCTATTCTGGGGGGTGGGGTGGGGCAGGACAGCAAGGGGGAG  
GATTGGGAAGACAATAGCAGGCATGCTGGGGATGCGGTGGGCTCTATGGCTTCT  
GAGGCGGAAAGAACCAGCTGGGGCTCTAGGGGGTATCCCCACGCGCCCTGTAGC  
GGCGCATTAAAGCGCGGGCGGGTGTGGTGGTTACGCGCAGCGTGACCGCTACACTT  
GCCAGCGCCCTAGCGCCCCTCCTTTTCGCTTTCTTCCCTTCCCTTCTCGCCACGTT  
CGCCGGCTTTCCCCGTCAAGCTCTAAATCGGGGGCTCCCTTTAGGGTTCCGATTT  
AGTGCTTTACGGCACCTCGACCCCAAAAACCTTGATTAGGGTGTGGTTCACGTA  
CCTAGAAGTTCCTATTCCGAAGTTCCTATTCTCTAGAAAGTATAGGAACTTCCCTT  
GGCCAAAAGCCTGAACTCACCGCGACGTCTGTGAGAAGTTTCTGATCGAAAA  
GTTTCGACAGCGTCTCCGACCTGATGCAGCTCTCGGAGGGCGAAGAATCTCGTGCT  
TTCAGCTTCGATGTAGGAGGGCGTGGATATGTCCTGCGGGTAAATAGCTGCGCCC  
ATGGTTTCTACAAAGATCGTTATGTTTATCGGCACCTTTGCATCGGCCGCGCTCCC  
GATTCCGGAAGTGCTTGACATTGGGGAATTCAGCGAGAGCCTGACCTATTGCATC  
TCCCGCCGTGCACAGGGTGTACGTTGCAAGACCTGCCTGAAACCGAACTGCC  
GCTGTTCTGCAGCCGGTTCGCGGAGGCCATGGATGCGATCGCTGCGGCCGATCTTA  
GCCAGACGAGCGGGTTCGGCCATTTCGACCGCAAGGAATCGGTCAATACTACTA  
CATGGCGTGATTTTCATATGCGCGATTGCTGATCCCATGTGTATCACTGGCAAAC  
TGTGATGGACGACACCGTTCAGTTCGCTCCGTCGCGCAGGCTCTCGATGAGCTGATG  
CTTTGGGCCGAGGACTGCCCCGAAGTCCGGCACCTCGTGCACGCGGATTTCCGGCT  
CCAACAATGTCTTGACGGACAATGGCCGCATAACAGCGGTCATTGACTGGAGCG  
AGGCGATGTTCCGGGGATTCCCAATACGAGGTCCCAACATCTTCTTCTGGAGGCC  
GTGGTTGGCTTGTATGGAGCAGCAGACGCGCTACTTCGAGCGGAGGCATCCGGA  
GCTTGCAGGATCGCCGCGGCTCCGGGCGTATATGCTCCGCATTGGTCTTGACCAA  
CTCTATCAGAGCTTGGTTGACGGCAATTTTCGATGATGCAGCTTGGGCGCAGGGTC  
GATGCGACGCAATCGTCCGATCCGGAGCCGGGACTGTCGGGCGTACACAAATCG  
CCCGCAGAAGCGCGGCCGTCTGGACCGATGGCTGTGTAGAAGTACTCGCCGATA  
GTGGAAACCGACGCCCCAGCACTCGTCCGAGGGCAAAGGAATAGCACGTACTION  
GAGATTTTCGATTCCACCGCCGCTTCTATGAAAGGTTGGGCTTCCGGAATCGTTTT  
CCGGGACGCCGGCTGGATGATCCTCCAGCGCGGGGATCTCATGCTGGAGTTCTTC  
GCCACCCCAACTTGTTTATTGCAGCTTATAATGGTTACAAATAAAGCAATAGCA  
TCACAAATTTACAAATAAAGCATTTTTTTCACTGCATTCTAGTTGTGGTTTGTCC  
AAACTCATCAATGTATCTTATCATGTCTGTATAACCGTCGACCTCTAGCTAGAGCTT  
GGCGTAATCATGGTCATAGCTGTTTCTGTGTGAAATTGTTATCCGCTCACAATTC  
CACACAACATACGAGCCGGAAGCATAAAGTGTAAGCCTGGGGTGCCTAATGAG  
TGAGCTAACTCACATTAATTGCGTTCGCTCACTGCCCGCTTTCAGTCGGGAAA  
CCTGTCGTGCCAGCTGCATTAATGAATCGGCCAACGCGCGGGGAGAGGGCGGTTT  
GCGTATTGGGCGCTTTCGCTTCCCTCGCTCACTGACTCGCTGCGCTCGGTTCGTT  
GGCTGCGGCGAGCGGTATCAGCTCACTCAAAGGCGGTAATACGGTTATCCACAG  
AATCAGGGGATAACGCAGGAAAGAACATGTGAGCAAAAAGGCCAGCAAAAAGGCC  
AGGAACCGTAAAAAGGCCGCGTTGCTGGCGTTTTTCCATAGGCTCCGCCCCCTG  
ACGAGCATCACAAAAATCGACGCTCAAGTCAGAGGTGGCGAAACCCGACAGGA  
CTATAAAGATAACAGGCGTTTCCCCCTGGAAGCTCCCTCGTGCCTCTCCTGTTT  
CGACCCTGCCGCTTACCGGATACCTGTCCGCTTTTCTCCCTTCGGGAAGCGTGGC  
GTTTTCTCATAGCTCACGCTGTAGGTATCTCAGTTCGGTGTAGGTTCGTTCCGCTCCA  
AGCTGGGCTGTGTGCACGAACCCCCGTTTCAGCCCGACCGCTGCGCCTTATCCGG  
TAACTATCGTCTTGAGTCCAACCCGGTAAGACACGACTTATCGCCACTGGCAGCA

GCCACTGGTAACAGGATTAGCAGAGCGAGGTATGTAGGCGGTGCTACAGAGTTC  
TTGAAGTGGTGGCCTAACTACGGCTACACTAGAAGAACAGTATTTGGTATCTGCG  
CTCTGCTGAAGCCAGTTACCTTCGGAAAAAGAGTTGGTAGCTCTTGATCCGGCAA  
ACAAACCACCGCTGGTAGCGGTGGTTTTTTTTGTTTGCAAGCAGCAGATTACGCGC  
AGAAAAAAGGATCTCAAGAAGATCCTTTGATCTTTTCTACGGGGTCTGACGCTC  
AGTGGAACGAAAACCTCACGTTAAGGGATTTTGGTCATGAGATTATCAAAAAGGA  
TCTTCACCTAGATCCTTTTTAAATTA AAAATGAAGTTTTAAATCAATCTAAAGTAT  
ATATGAGTAAACTTGGTCTGACAGTTACCAATGCTTAATCAGTGAGGCACCTATC  
TCAGCGATCTGTCTATTTCTGTTTCATCCATAGTTGCCTGACTCCCCGTCGTGTAGAT  
AACTACGATACGGGAGGGCTTACCATCTGGCCCCAGTGCTGCAATGATACCGCG  
AGACCCACGCTCACCGGCTCCAGATTTATCAGCAATAAACCAGCCAGCCGGAAG  
GGCCGAGCGCAGAAGTGGTCCTGCAACTTTATCCGCCTCCATCCAGTCTATTAAT  
TGTTGCCGGGAAGCTAGAGTAAGTAGTTCGCCAGTTAATAGTTTGCGCAACGTTG  
TTGCCATTGCTACAGGCATCGTGGTGTACGCTCGTCGTTTGGTATGGCTTCATTC  
AGCTCCGGTTCCCAACGATCAAGGCGAGTTACATGATCCCCATGTTGTGCAAAA  
AAGCGGTTAGCTCCTTCGGTCCCTCCGATCGTTGTCAGAAGTAAGTTGGCCGCAGT  
GTTATCACTCATGGTTATGGCAGCACTGCATAATTCTCTTACTGTCATGCCATCCG  
TAAGATGCTTTTCTGTGACTGGTGAGTACTCAACCAAGTCATTCTGAGAATAGTG  
TATGCCGGCGACCGAGTTGCTCTTGCCCCGGCGTCAATACGGGATAATACCGCGCCA  
CATAGCAGAACTTTAAAAGTGCTCATCATTGGAAAACGTTCTTCGGGGCGAAAA  
CTCTCAAGGATCTTACCGCTGTTGAGATCCAGTTCGATGTAACCCACTCGTGAC  
CCA ACTGATCTTCAGCATCTTTTACTTTCACCAGCGTTTCTGGGTGAGCAAAAAC  
AGGAAGGCAAAATGCCGCAAAAAGGGAATAAGGGCGACACGGAAATGTTGAA  
TACTCATACTCTTCTTTTTCAATATTATTGAAGCATTTATCAGGGTTATTGTCTC  
ATGAGCGGATACATATTTGAATGTATTTAGAAAAATAAACAATAGGGGTCCG  
CGCACATTTCCCCGAAAAGTGCCACCTGACGTC

pcDNA5/FRT/TO-mCherry-A $\beta$ (WT)

GACGGATCGGGAGATCTCCCGATCCCCTATGGTGC ACTCTCAGTACAATCTGCTC  
TGATGCCGCATAGTTAAGCCAGTATCTGCTCCCTGCTTGTGTGTTGGAGGTCGCT  
GAGTAGTGCGCGAGCAAAATTTAAGCTACAACAAGGCAAGGCTTGACCGACAAT  
TGCATGAAGAATCTGCTTAGGGTTAGGCGTTTTGCGCTGCTTCGCGATGTACGGG  
CCAGATATACGCGTTGACATTGATTATTGACTAGTTATTAATAGTAATCAATTAC  
GGGGTCATTAGTTCATAGCCCATATATGGAGTTCCGCGTTACATAACTTACGGTA  
AATGGCCCCGCTGGCTGACCGCCCAACGACCCCCGCCCATTGACGTCAATAATG  
ACGTATGTTCCCATAGTAACGCCAATAGGGACTTTCCATTGACGTCAATGGGTGG  
AGTATTTACGGTAAACTGCCACTTGGCAGTACATCAAGTGTATCATATGCCAAG  
TACGCCCCCTATTGACGTCAATGACGGTAAATGGCCCCGCTGGCATTATGCCAG  
TACATGACCTTATGGGACTTTCCTACTTGGCAGTACATCTACGTATTAGTCATCGC  
TATTACCATGGTGTATGCGGTTTTGGCAGTACATCAATGGGCGTGGATAGCGGTTT  
GACTCACGGGGATTTCCAAGTCTCCACCCCATTTGACGTCAATGGGAGTTTGT  
GGCACCAAAATCAACGGGACTTTCCAAAATGTCGTAACA ACTCCGCCCCATTGA  
CGCAAATGGGCGGTAGGCGTGTACGGTGGGAGGTCTATATAAGCAGAGCTCTCC  
CTATCAGTGATAGAGATCTCCCTATCAGTGATAGAGATCGTCGACGAGCTCGTTT  
AGTGAACCGTCAGATCGCCTGGAGACGCCATCCACGCTGTTTTGACCTCCATAGA  
AGACACCGGGACCGATCCAGCCTCCGGACTCTAGCGTTTAAACTTAAGCTTGCCA  
CCATGGATGCGGAATTTGCCATGATTCTGGCTATGAAGTGCATCATCAGAACT

GGTGTTTTTTTCGGAAGATGTGGGCTCTAACAAAGGCGCGATTATTGGCCTGATG  
GTGGGCGGCGTGGTGATTGCGGGATCCGCTGGCTCCGCTGCTGGTTCTGGCGAAT  
CCCATATGGTGAGCAAGGGCGAGGAGGATAACATGGCCATCATCAAGGAGTTCA  
TGCGCTTCAAGGTGCACATGGAGGGCTCCGTGAACGGCCACGAGTTCGAGATCG  
AGGGCGAGGGCGAGGGCCGCCCTACGAGGGCACCAGACCGCCAAGCTGAAG  
GTGACCAAGGGTGGCCCCCTGCCCTTCGCCTGGGACATCCTGTCCCCTCAGTTCA  
TGTACGGCTCCAAGGCCTACGTGAAGCACCCCGCCGACATCCCCGACTACTTGAA  
GCTGTCTTCCCCGAGGGCTTCAAGTGGGAGCGCGTGATGAACTTCGAGGACGG  
CGGCGTGGTGACCGTGACCCAGGACTCCTCCCTGCAGGACGGCGAGTTCATCTAC  
AAGGTGAAGCTGCGCGGCACCAACTTCCCCTCCGACGGCCCCGTAATGCAGAAG  
AAGACCATGGGCTGGGAGGCCTCCTCCGAGCGGATGTACCCCGAGGACGGCGCC  
CTGAAGGGCGAGATCAAGCAGAGGCTGAAGCTGAAGGACGGCGGGCCACTACGA  
CGCTGAGGTCAAGACCACCTACAAGGCCAAGAAGCCCGTGCAGCTGCCCGGCGC  
CTACAACGTCAACATCAAGTTGGACATCACCTCCCACAACGAGGACTACCCAT  
CGTGGAACAGTACGAACGCGCCGAGGGCCGCCACTCCACC GGCGGCATGGACGA  
NCTGTACAAGTAACTCGAGTCTAGAGGGCCCGTTTTAAACCCGCTGATCAGCCTCG  
ACTGTGCCTTCTAGTTGCCAGCCATCTGTTGTTTGCCCCTCCCCCGTGCCTTCCTT  
GACCCTGGAAGGTGCCACTCCCCTGTCTTTCCTAATAAAATGAGGAAATTGCA  
TCGCATTGTCTGAGTAGGTGTCATTCTATTCTGGGGGGTGGGGTGGGGCAGGACA  
GCAAGGGGGGAGGATTGGGAAGACAATAGCAGGCATGCTGGGGATGCGGTGGGC  
TCTATGGCTTCTGAGGCGGAAAGAACCAGCTGGGGCTCTAGGGGGTATCCCCAC  
GCGCCCTGTAGCGGCGCATTAAAGCGCGGGGGTGTGGTGGTTACGCGCAGCGTG  
ACCGCTACACTTGCCAGCGCCCTAGCGCCCGCTCCTTTCGCTTTCCTCCCTCCTT  
TCTCGCCACGTTCCGGGCTTTCCCCGTCAAGCTCTAAATCGGGGGCTCCCTTA  
GGGTTCCGATTTAGTGCTTACGGCACCTCGACCCCAAAAACCTTGATTAGGGTG  
ATGGTTCACGTACCTAGAAGTTCCTATTCCGAAGTTCCTATTCTCTAGAAAGTAT  
AGGAACTTCCTTGGCCAAAAAGCCTGAACTCACCGCGACGTCTGTGAGAAAGTTT  
CTGATCGAAAAGTTCGACAGCGTCTCCGACCTGATGCAGCTCTCGGAGGGCGAA  
GAATCTCGTGCTTTCAGCTTCGATGTAGGAGGGCGTGGATATGTCCTGCGGGTAA  
ATAGCTGCGCCGATGGTTTCTACAAAGATCGTTATGTTTATCGGCACTTTGCATC  
GGCCGCGCTCCCGATTCCGGAAGTGCTTGACATTGGGGAATTCAGCGAGAGCCT  
GACCTATTGCATCTCCCGCCGTGCACAGGGTGTACGTTGCAAGACCTGCCTGAA  
ACCGAACTGCCCGCTGTTCTGCAGCCGGTCGCGGAGGCCATGGATGCGATCGCT  
GCGGCCGATCTTAGCCAGACGAGCGGGTTCGGCCCATTCGGACCGCAAGGAATC  
GGTCAATACTACATGGCGTGATTTTCATATGCGCGATTGCTGATCCCCATGTGT  
ATCACTGGCAAACCTGTGATGGACGACACCGTCAGTGCGTCCGTCGCGCAGGCTCT  
CGATGAGCTGATGCTTTGGGCCGAGGACTGCCCCGAAGTCCGGCACCTCGTGCA  
CGCGGATTCGGCTCCAACAATGTCTTGACGGACAATGGCCGCATAACAGCGGT  
CATTGACTGGAGCGAGGCGATGTTCCGGGGATTCCCAATACGAGGTCGCCAACAT  
CTTCTTCTGGAGGCCGTGGTTGGCTTGTATGGAGCAGCAGACGCGCTACTTCGAG  
CGGAGGCATCCGGAGCTTGCAGGATCGCCGCGGCTCCGGGCGTATATGCTCCGC  
ATTGGTCTTGACCAACTCTATCAGAGCTTGGTTGACGGCAATTCGATGATGCAG  
CTTGGGCGCAGGGTCGATGCGACGCAATCGTCCGATCCGGAGCCGGGACTGTGCG  
GGCGTACACAAATCGCCCGCAGAAGCGCGGCCGTCTGGACCGATGGCTGTGTAG  
AAGTACTCGCCGATAGTGGAACCGACGCCCCAGCACTCGTCCGAGGGCAAAGG  
AATAGCACGTACTACGAGATTTTCGATTCCACC GCCCCTTCTATGAAAGGTTGGG  
CTTCGGAATCGTTTTCCGGGACGCCGGCTGGATGATCCTCCAGCGCGGGGATCTC  
ATGCTGGAGTTCTTCGCCACCCCAACTTGTTTATTGCAGCTTATAATGGTTACAA  
ATAAAGCAATAGCATCACAAATTTACAAATAAAGCATTTTTTTTCACTGCATTCT  
AGTTGTGGTTTGTCCAACTCATCAATGTATCTTATCATGTCTGTATAACCGTCGAC

CTCTAGCTAGAGCTTGGCGTAATCATGGTCATAGCTGTTTCCTGTGTGAAATTGTT  
ATCCGCTCACAAATCCACACAACATACGAGCCGGAAGCATAAAGTGTAAGCCT  
GGGGTGCCTAATGAGTGAGCTAACTCACATTAATTGCGTTGCGCTCACTGCCCGC  
TTTCCAGTCGGGAAACCTGTCGTGCCAGCTGCATTAATGAATCGGCCAACGCGCG  
GGGAGAGGCGGTTTGCATATTGGGCGCTCTTCCGCTTCCTCGCTCACTGACTCGC  
TGCGCTCGGTCGTTTCGGCTGCGGCGAGCGGTATCAGCTCACTCAAAGGCGGTAAT  
ACGGTTATCCACAGAATCAGGGGATAACGCAGGAAAGAACATGTGAGCAAAAG  
GCCAGCAAAAGGCCAGGAACCGTAAAAAGGCCGCGTTGCTGGCGTTTTTCCATA  
GGCTCCGCCCCCTGACGAGCATCACAAAATCGACGCTCAAGTCAGAGGTGGC  
GAAACCCGACAGGACTATAAAGATACCAGGCGTTTCCCCCTGGAAGCTCCCTCG  
TGCGCTCTCCTGTTCCGACCCTGCCGCTTACCGGATACCTGTCCGCTTTTCTCCCT  
TCGGGAAGCGTGGCGCTTTCTCATAGCTCACGCTGTAGGTATCTCAGTTCGGTGT  
AGGTCGTTTCGCTCCAAGCTGGGCTGTGTGCACGAACCCCCCGTTCAGCCCAGCCG  
CTGCGCCTTATCCGGTAACTATCGTCTTGAGTCCAACCCGGTAAGACACGACTTA  
TCGCCACTGGCAGCAGCCACTGGTAACAGGATTAGCAGAGCGAGGTATGTAGGC  
GGTGCTACAGAGTTCTTGAAGTGGTGGCCTAACTACGGCTACACTAGAAGAACA  
GTATTTGGTATCTGCGCTCTGCTGAAGCCAGTTACCTTCGGAAAAAGAGTTGGTA  
GCTCTTGATCCGGCAAACAAACCACCGCTGGTAGCGGTGGTTTTTTTTGTTTCAA  
GCAGCAGATTACGCGCAGAAAAAAGGATCTCAAGAAGATCCTTTGATCTTTTCT  
ACGGGGTCTGACGCTCAGTGGAACGAAAACCTCACGTTAAGGGATTTTGGTCATG  
AGATTATCAAAAAGGATCTTCACCTAGATCCTTTTAAATTA AAAATGAAGTTTAA  
AATCAATCTAAAGTATATATGAGTAACTTGGTCTGACAGTTACCAATGCTTAAT  
CAGTGAGGCACCTATCTCAGCGATCTGTCTATTTTCGTTTCATCCATAGTTGCCTGAC  
TCCCCGTCGTGTAGATAACTACGATACGGGAGGGCTTACCATCTGGCCCCAGTGC  
TGCAATGATACCGCGAGACCCACGCTCACCGGCTCCAGATTTATCAGCAATAAA  
CCAGCCAGCCGGAAGGGCCGAGCGCAGAAGTGGTCTTCAACTTTATCCGCCTC  
CATCCAGTCTATTAATTGTTGCCGGGAAGCTAGAGTAAGTAGTTTCGCCAGTTAAT  
AGTTTTCGCAACGTTGTTGCCATTGCTACAGGCATCGTGGTGTACGCTCGTCGT  
TTGGTATGGCTTCATTCAGCTCCGGTTCCCAACGATCAAGGCGAGTTACATGATC  
CCCCATGTTGTGCAAAAAAGCGGTTAGCTCCTTCGGTCTTCCGATCGTTGTCAGA  
AGTAAGTTGGCCGAGTGTATCACTCATGGTTATGGCAGCACTGCATAATTCTC  
TACTGTCATGCCATCCGTAAGATGCTTTTCTGTGACTGGTGAGTACTCAACCAA  
GTCATTCTGAGAATAGTGTATGCGGCGACCGAGTTGCTCTTGCCCGGCGTCAATA  
CGGGATAATACCGCGCCACATAGCAGAACTTTAAAAGTGCTCATCATTGAAAAA  
CGTTCCTTCGGGGCGAAAACCTCTCAAGGATCTTACCGCTGTTGAGATCCAGTTCGA  
TGTAACCCACTCGTGCACCCA ACTGATCTTCAGCATCTTTTACTTTCACCAGCGTT  
TCTGGGTGAGCAAAAACAGGAAGGCAAAATGCCGCAAAAAAGGGAATAAGGGC  
GACACGGAAATGTTGAATACTCATACTCTTCTTTTCAATATTATTGAAGCATTT  
ATCAGGGTTATTGTCTCATGAGCGGATACATATTTGAATGTATTTAGAAAAATAA  
ACAAATAGGGGTTCCGCGCACATTTCCCCGAAAAGTGCCACCTGACGTC

pcDNA5/FRT/TO-mCherry-A $\beta$ (E22G)

GACGGATCGGGAGATCTCCCGATCCCCTATGGTGC ACTCTCAGTACAATCTGCTC  
TGATGCCGCATAGTTAAGCCAGTATCTGCTCCCTGCTTGTGTGTTGGAGGTCGCT  
GAGTAGTGCGCGAGCAAAATTTAAGCTACAACAAGGCAAGGCTTGACCGACAAT  
TGCATGAAGAATCTGCTTAGGGTTAGGCGTTTTGCGCTGCTTCGCGATGTACGGG  
CCAGATATACGCGTTGACATTGATTATTGACTAGTTATTAATAGTAATCAATTAC  
GGGGTCATTAGTTCATAGCCCATATATGGAGTTCGCGGTTACATAACTTACGGTA  
AATGGCCCCGCTGGCTGACCGCCCAACGACCCCCGCCATTGACGTCAATAATG

ACGTATGTTCCCATAGTAACGCCAATAGGGACTTTCCATTGACGTCAATGGGTGG  
AGTATTTACGGTAAACTGCCACTTGGCAGTACATCAAGTGTATCATATGCCAAG  
TACGCCCCCTATTGACGTCAATGACGGTAAATGGCCCCGCTGGCATTATGCCAG  
TACATGACCTTATGGGACTTTCCTACTTGGCAGTACATCTACGTATTAGTCATCGC  
TATTACCATGGTGTATGCGGTTTTGGCAGTACATCAATGGGCGTGGATAGCGGTTT  
GACTCACGGGGATTTCCAAGTCTCCACCCCATGACGTCAATGGGAGTTTGT  
GGCACCAAAATCAACGGGACTTTCCAAAATGTCGTAACAACCTCCGCCCCATTGA  
CGCAAATGGGCGGTAGGCGTGTACGGTGGGAGGTCTATATAAGCAGAGCTCTCC  
CTATCAGTGATAGAGATCTCCCTATCAGTGATAGAGATCGTCGACGAGCTCGTTT  
AGTGAACCGTCAGATCGCCTGGAGACGCCATCCACGCTGTTTTGACCTCCATAGA  
AGACACCGGGACCGATCCAGCCTCCGGACTCTAGCGTTTAAACTTAAGCTTGCCA  
CCATGGATGCGGAATTCGCCATGATTCTGGCTATGAAGTGCATCATCAGAACT  
GGTGTTTTTTTCGGGGCGATGTGGGCTCTAACAAAGGCGCGATTATTGGCCTGATG  
GTGGGCGGCGTGGTATTGCGGGATCCGCTGGCTCCGCTGCTGGTTCTGGCGAAT  
CCCATATGGTGAGCAAGGGCGAGGAGGATAACATGGCCATCATCAAGGAGTTCA  
TGCGCTTCAAGGTGCACATGGAGGGCTCCGTGAACGGCCACGAGTTCGAGATCG  
AGGGCGAGGGCGAGGGCCGCCCTACGAGGGCACCCAGACCGCCAAGCTGAAG  
GTGACCAAGGGTGGCCCCCTGCCCTTCGCCTGGGACATCCTGTCCCCTCAGTTCA  
TGTACGGCTCCAAGGCCTACGTGAAGCACCCCGCCGACATCCCCGACTACTTGAA  
GCTGTCTTCCCCGAGGGCTTCAAGTGGGAGCGCGTGATGAACTTCGAGGACGG  
CGGCGTGGTGACCGTGACCCAGGACTCCTCCCTGCAGGACGGCGAGTTCATCTAC  
AAGGTGAAGCTGCGCGGCACCAACTTCCCCTCCGACGGCCCCGTAATGCAGAAG  
AAGACCATGGGCTGGGAGGCCTCCTCCGAGCGGATGTACCCCGAGGACGGCGCC  
CTGAAGGGCGAGATCAAGCAGAGGCTGAAGCTGAAGGACGGCGGCCACTACGA  
CGCTGAGGTCAAGACCACCTACAAGGCCAAGAAGCCCGTGCAGCTGCCCGGCGC  
CTACAACGTCAACATCAAGTTGGACATCACCTCCCACAACGAGGACTACACCAT  
CGTGGAACAGTACGAACGCGCCGAGGGCCGCCACTCCACCGGCGGCATGGACGA  
NCTGTACAAGTAACTCGAGTCTAGAGGGCCCGTTTAAACCCGCTGATCAGCCTCG  
ACTGTGCCTTCTAGTTGCCAGCCATCTGTTGTTTGGCCCTCCCCCGTGCCTTCCTT  
GACCCTGGAAGGTGCCACTCCCCTGTCCTTTCCTAATAAAAATGAGGAAATTGCA  
TCGCATTGTCTGAGTAGGTGTCATTCTATTCTGGGGGGTGGGGTGGGGCAGGACA  
GCAAGGGGGGAGGATTGGGAAGACAATAGCAGGCATGCTGGGGATGCGGTGGGC  
TCTATGGCTTCTGAGGCGGAAAGAACCAGCTGGGGCTCTAGGGGGTATCCCCAC  
GCGCCCTGTAGCGGCGCATTAAAGCGCGGGGTGTGGTGGTTACGCGCAGCGTG  
ACCGCTACACTTGCCAGCGCCCTAGCGCCCGCTCCTTTCGCTTTCCTCCCTTCCTT  
TCTCGCCACGTTCCCGGCTTTCCCCGTCAAGCTCTAAATCGGGGGCTCCCTTA  
GGGTTCGATTTAGTGCTTACGGCACCTCGACCCCAAAAACTTGATTAGGGTG  
ATGGTTCACGTACCTAGAAGTTCCTATTCCGAAGTTCCTATTCTCTAGAAAGTAT  
AGGAACTTCCTTGGCCAAAAGCCTGAACTCACCGCGACGTCTGTGAGAAAGTTT  
CTGATCGAAAAGTTCGACAGCGTCTCCGACCTGATGCAGCTCTCGGAGGGCGAA  
GAATCTCGTGCTTTCAGCTTCGATGTAGGAGGGCGTGGATATGTCCTGCGGGTAA  
ATAGCTGCGCCGATGGTTTCTACAAGATCGTTATGTTTATCGGCACTTTGCATC  
GGCCGCGCTCCCGATTCCGGAAGTGCTTGACATTGGGGAATTCAGCGAGAGCCT  
GACCTATTGCATCTCCCGCCGTGCACAGGGTGTACGTTGCAAGACCTGCCTGAA  
ACCGAACTGCCCCGCTGTTCTGCAGCCGGTCCGCGGAGGCCATGGATGCGATCGCT  
GCGGCCGATCTTAGCCAGACGAGCGGGTTCGGCCCATTCGGACCGCAAGGAATC  
GGTCAATACTACATGGCGTGATTTTCATATGCGCGATTGCTGATCCCCATGTGT  
ATCACTGGCAAACGTGTGATGGACGACACCGTCAAGTGCCTCGCGCAGGCTCT  
CGATGAGCTGATGCTTTGGGCCGAGGACTGCCCGAAGTCCGGCACCTCGTGCA  
CGCGGATTTCCGGCTCCAACAATGTCCTGACGGACAATGGCCGCATAACAGCGGT



CATTGACTGGAGCGAGGCGATGTTTCGGGGATTCCCAATACGAGGTCGCCAACAT  
CTTCTTCTGGAGGCCGTGGTTGGCTTGTATGGAGCAGCAGACGCGCTACTTCGAG  
CGGAGGCATCCGGAGCTTGCAGGATCGCCGCGGCTCCGGGCGTATATGCTCCGC  
ATTGGTCTTGACCAACTCTATCAGAGCTTGGTTGACGGCAATTTTCGATGATGCAG  
CTTGGGCGCAGGGTTCGATGCGACGCAATCGTCCGATCCGGAGCCGGGACTGTGCG  
GGCGTACACAAATCGCCCGCAGAAGCGCGGCCGTCTGGACCGATGGCTGTGTAG  
AAGTACTCGCCGATAGTGGAACCGACGCCCCAGCACTCGTCCGAGGGCAAAGG  
AATAGCACGTACTACGAGATTTTCGATTCCACCGCCGCCTTCTATGAAAGGTTGGG  
CTTCGGAATCGTTTTCCGGGACGCCGGCTGGATGATCCTCCAGCGCGGGGATCTC  
ATGCTGGAGTTCTTCGCCACCCCAACTTGTTTATTGCAGCTTATAATGGTTACAA  
ATAAAGCAATAGCATCACAAATTTACAAATAAAGCATTTTTTTTTACTGCATTCT  
AGTTGTGGTTTTGTCCAACTCATCAATGTATCTTATCATGTCTGTATACCGTCGAC  
CTCTAGCTAGAGCTTGGCGTAATCATGGTCATAGCTGTTTCCTGTGTGAAATTGTT  
ATCCGCTCACAAATTCACACAACATACGAGCCGGAAGCATAAAGTGTAAGCCT  
GGGGTGCCTAATGAGTGAGCTAACTCACATTAATTGCGTTGCGCTCACTGCCCGC  
TTCCAGTCGGGAAACCTGTCGTGCCAGCTGCATTAATGAATCGGCCAACGCGCG  
GGGAGAGGCGGTTTTGCGTATTGGGCGCTCTTCCGCTTCCTCGCTCACTGACTCGC  
TGCGCTCGGTCGTTCCGGCTGCGGGCAGCGGTATCAGCTCACTCAAAGGCGGTAAT  
ACGGTTATCCACAGAATCAGGGGATAACGCAGGAAAGAACATGTGAGCAAAG  
GCCAGCAAAGGCCAGGAACCGTAAAAAGGCCGCGTTGCTGGCGTTTTTCCATA  
GGCTCCGCCCCCTGACGAGCATCACAAAATCGACGCTCAAGTCAGAGGTGGC  
GAAACCCGACAGGACTATAAAGATACCAGGGCGTTTCCCCCTGGAAGCTCCCTCG  
TGCGCTCTCCTGTTCCGACCCTGCCGCTTACCGGATACCTGTCCGCCTTTCTCCCT  
TCGGGAAGCGTGGCGCTTTCTCATAGCTACGCTGTAGGTATCTCAGTTCGGTGT  
AGGTCGTTTCGCTCCAAGCTGGGCTGTGTGCACGAACCCCCGTTTCAGCCCGACCG  
CTGCGCCTTATCCGGTAACCTATCGTCTTGAGTCCAACCCGGTAAGACACGACTTA  
TCGCCACTGGCAGCAGCCACTGGTAACAGGATTAGCAGAGCGAGGTATGTAGGC  
GGTGCTACAGAGTTCTTGAAGTGGTGGCCTAACTACGGCTACACTAGAAGAACA  
GTATTTGGTATCTGCGCTCTGCTGAAGCCAGTTACCTTCGGAAAAAGAGTTGGTA  
GCTCTTGATCCGGCAAACAAACCACCGCTGGTAGCGGTGGTTTTTTTTGTTTGCAA  
GCAGCAGATTACGCGCAGAAAAAAGGATCTCAAGAAGATCCTTTGATCTTTTCT  
ACGGGGTCTGACGCTCAGTGGAACGAAAACCTCACGTTAAGGGATTTTGGTCATG  
AGATTATCAAAAAGGATCTTCACCTAGATCCTTTTAAATTA AAAATGAAGTTTAA  
AATCAATCTAAAGTATATATGAGTAAACTTGGTCTGACAGTTACCAATGCTTAAT  
CAGTGAGGCACCTATCTCAGCGATCTGTCTATTTTCGTTTCATCCATAGTTGCCTGAC  
TCCCCGTCGTGTAGATAACTACGATACGGGAGGGCTTACCATCTGGCCCCAGTGC  
TGCAATGATACCGCGAGACCCACGCTCACCGGCTCCAGATTTATCAGCAATAAA  
CCAGCCAGCCGGAAGGGCCGAGCGCAGAAGTGGTCTGCAACTTTATCCGCCTC  
CATCCAGTCTATTAATTGTTGCCGGGAAGCTAGAGTAAGTAGTTCGCCAGTTAAT  
AGTTTTCGCAACGTTGTTGCCATTGCTACAGGCATCGTGGTGTACGCTCGTCGT  
TTGGTATGGCTTCATTCAGCTCCGGTTCCCAACGATCAAGGCGAGTTACATGATC  
CCCCATGTTGTGCAAAAAAGCGGTTAGCTCCTTCGGTCTCCTCCGATCGTTGTCAGA  
AGTAAGTTGGCCGCAGTGTTATCACTCATGGTTATGGCAGCACTGCATAATTCTC  
TACTGTCATGCCATCCGTAAGATGCTTTTCTGTGACTGGTGAGTACTCAACCAA  
GTCATTCTGAGAATAGTGTATGCGGGCAGCGAGTTGCTCTTGCCCGGCGTCAATA  
CGGGATAATACCGCGCCACATAGCAGAACTTTAAAAGTGCTCATCATTGAAAAA  
CGTTCTTCGGGGCGAAAACCTCTCAAGGATCTTACCGCTGTTGAGATCCAGTTCGA  
TGTAACCCACTCGTGCACCCAACCTGATCTTCAGCATCTTTTACTTTTACCAGCGTT  
TCTGGGTGAGCAAAAACAGGAAGGCAAAAATGCCGCAAAAAAGGGAATAAGGGC  
GACACGGAAATGTTGAATACTCATACTCTTCTTTTCAATATTATTGAAGCATTT

ATCAGGGTTATTGTCTCATGAGCGGATACATATTTGAATGTATTTAGAAAAATAA  
ACAAATAGGGGTTCCGCGCACATTTCCCCGAAAAGTGCCACCTGACGTC
